# Supplementary material for: The Influence of Argon Cluster Ion Bombardment on the Characteristics of AlN Films on Glass-Ceramics and Si Substrates
Source: MDPI journal article supplement (doi:10.3390/nano12040670), 2022-02-17
Supplement: s1 [file s1]

# The Influence of Argon Cluster Ion Bombardment on the Characteristics of AlN films on Glass-Ceramics and Si Substrates

Ivan V. Nikolaev <sup>1,2,\*</sup>, Pavel V. Geydt <sup>1,\*</sup>, Nikolay G. Korobeishchikov <sup>2</sup>, Aleksandr V. Kapishnikov <sup>1,3</sup>, Vladimir A. Volodin <sup>1,4</sup>, Ivan A. Azarov <sup>1,4</sup>, Vladimir I. Strunin <sup>5,6</sup> and Evgeny Y. Gerasimov <sup>3</sup>

<sup>1</sup> Laboratory of Functional Diagnostics of Low-dimensional Structures for Nanoelectronics, Novosibirsk State University, Novosibirsk 630090, Russia; a.kapishnikov@nsu.ru (A.V.K.); v.volodin@nsu.ru (V.A.V.); i.azarov@nsu.ru (I.A.A.)

<sup>2</sup> Department of Applied Physics, Novosibirsk State University, Novosibirsk 630090, Russia; korobei@nsu.ru

<sup>3</sup> Boreskov Institute of Catalysis, Russian Academy of Sciences (Siberian Branch), Novosibirsk 630090, Russia; gerasimov@catalysis.ru

<sup>4</sup> Rzhzanov Institute of Semiconductor Physics, Russian Academy of Sciences (Siberian Branch), Novosibirsk 630090, Russia

<sup>5</sup> Department of Experimental Physics and Radiophysics, Dostoevsky Omsk State University, Omsk 644077, Russia; struninvi@omsu.ru

<sup>6</sup> Institute of Radiophysics and Physical Electronics, Omsk Scientific Center, Russian Academy of Sciences (Siberian Branch), Omsk 644024, Russia

\* Correspondence: i.nikolaev@nsu.ru (I.V.N.); p.geydt@nsu.ru (P.V.G.)

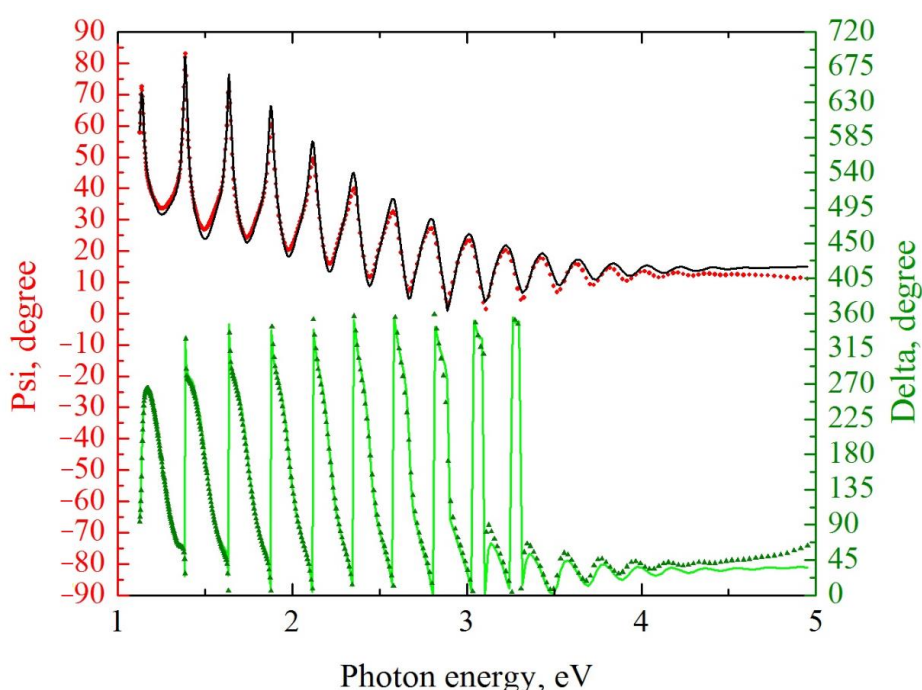

Figure S1. Results of ellipsometry multilayer model.
